# Supplementary material
Source: PubMed Central journal article supplement (PMC4415091)
Supplement: NIHMS657331-supplement-1.pdf [file NIHMS657331-supplement-1.pdf]

**Supplementary Figure 1: The usual dietary intakes are different between rural Africans and African Americans**

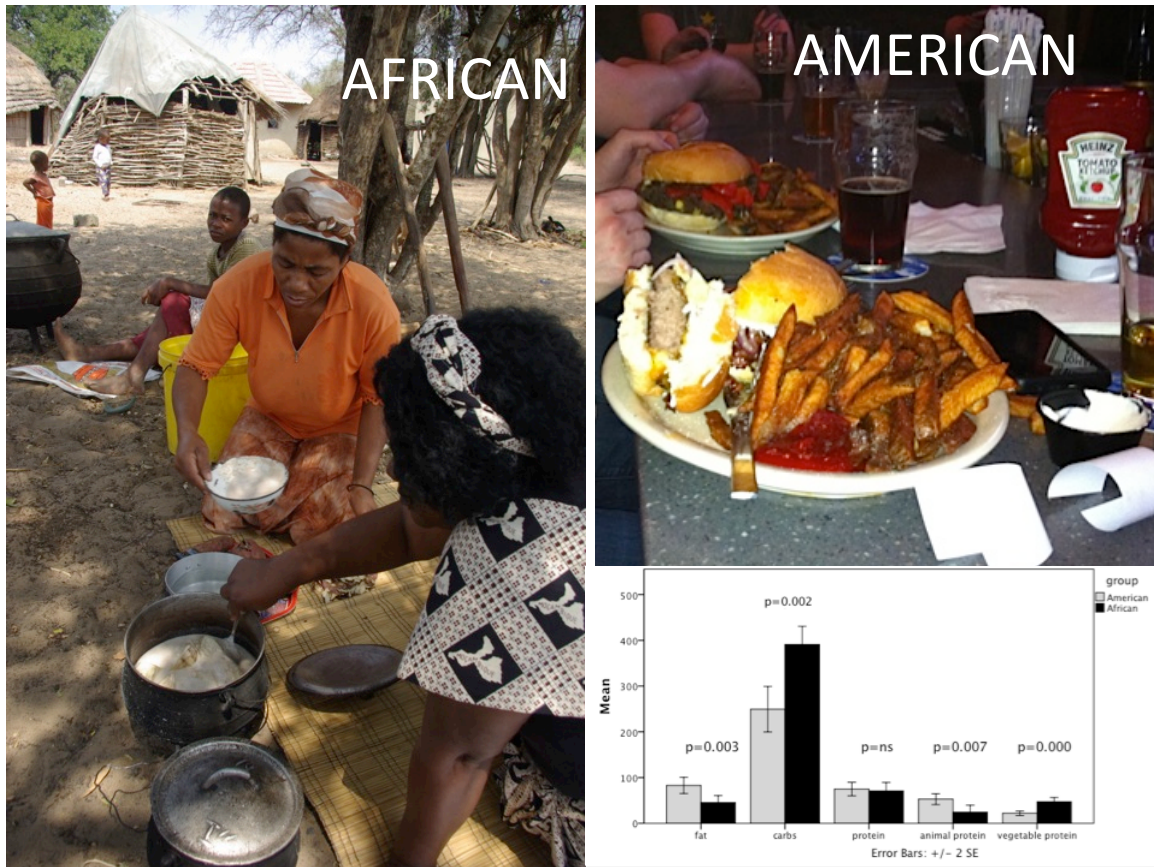

Photographic illustrations of key differences in usual food preparation and cooking methods between rural South Africans in KwaZulu-Natal, and westernized American populations in Pittsburgh, USA, with a comparative analysis of key macronutrient differences (g/d) based on dietary recall in the last 11 African American subjects and in 20 rural Africans with significance testing by Mann-Whitney U test. Not included for reasons of scale, was the significantly higher fibre intake in Africans 28g/d fiber, plus an estimated 38g/d resistant starch generated in cooking ‘putu’ as discussed under Supplementary Methods and shown on Supplementary Table 2, vs. 14g/d in African Americans,  $p < 0.0001$ . Photographs by SJDOK.

**Supplementary Figure 2: Changes in Epithelial Proliferation in Different Regions of the Colon**

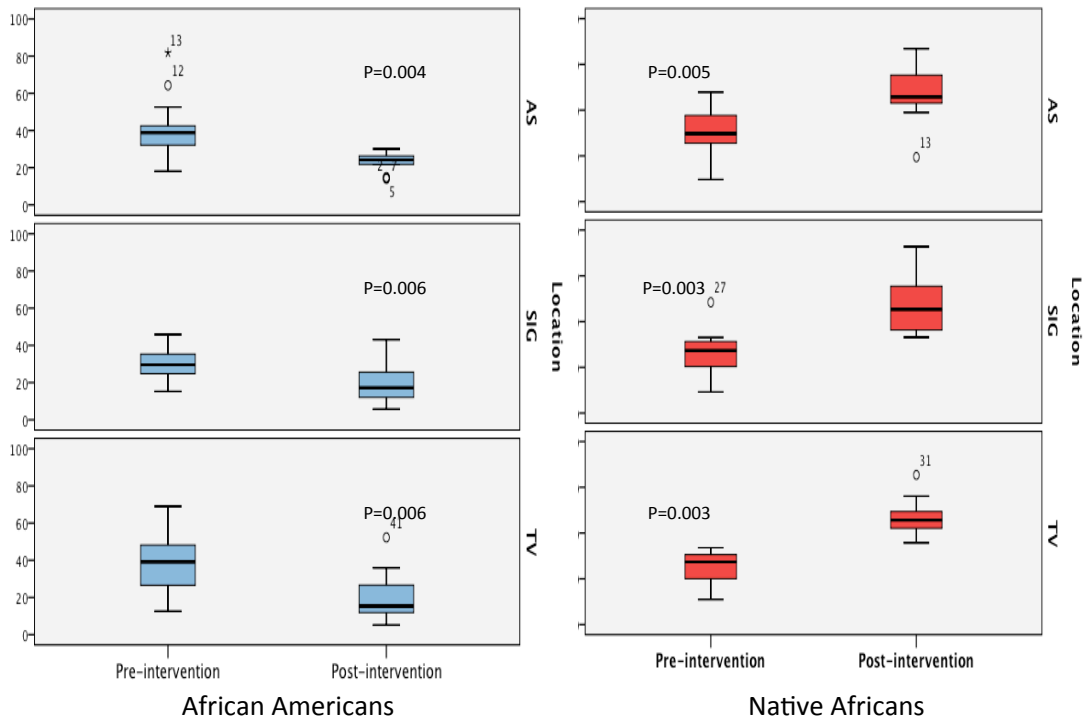

Illustration of the changes in epithelial proliferation measured by Ki67 crypt staining in mucosal biopsy samples from different regions of the colon in 20 African Americans and 12 rural Africans after dietary switch showing similar changes throughout the colon, where AS = ascending colon, SIG = sigmoid colon, and TV = transverse colon. Statistical testing by Wilcoxon Signed Rank test.

**Supplementary Figure 3: Colonoscopic and Histological Evidence of Parasitic Infections in rural Africans**

## Colonic Parasites in Africans

Right: Tapeworm segment in transverse colon at endoscopy  
Below: Colonoscopic appearance of patchy, left sided colitis, with biopsy H&E staining schistosoma (arrows), granuloma and lymphocytic infiltration.

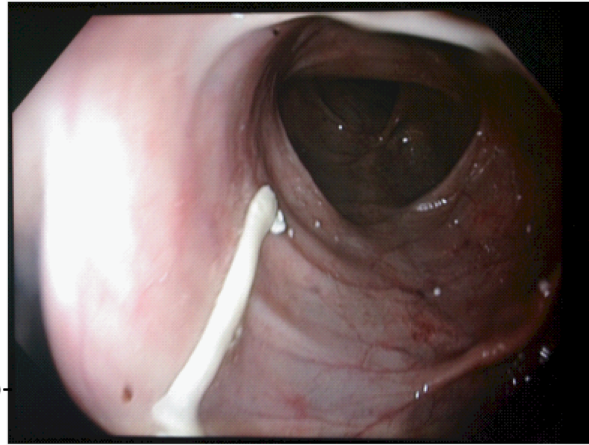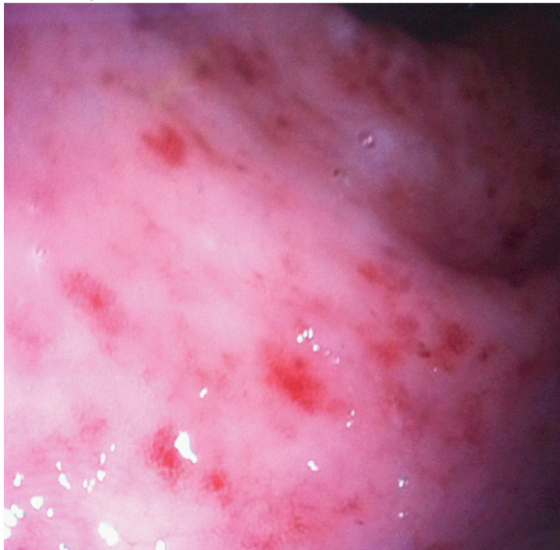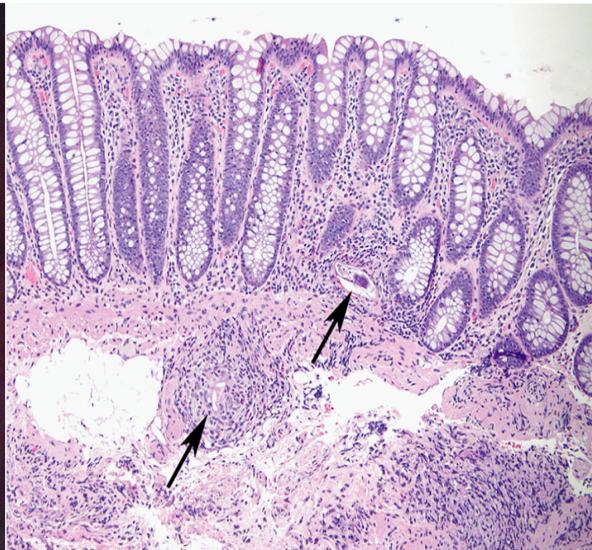

Colonoscopy findings in rural Africans, illustrating the high background of inflammation (H&E staining) and parasites

**Supplementary Figure 4: Grading for Colonic Mucosal Macrocytic Infiltration**

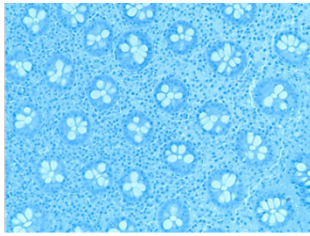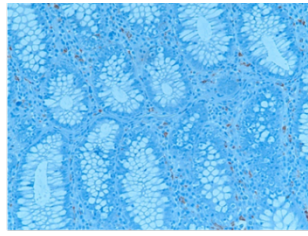

Grade 1: No/ Week  
<15 +ve cell/ HPF

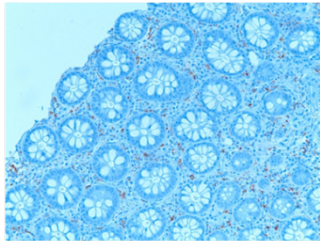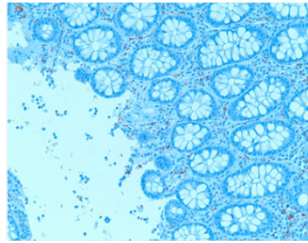

Grade 2: Moderate  
15 -40+ve cell/ HPF

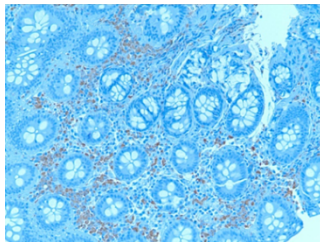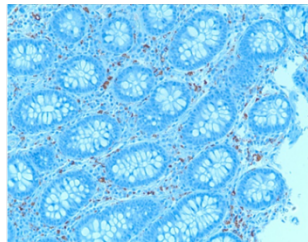

Grade 3: Strong/ Robest  
>40+ve cell/ HPF

The number of CD68 positive cells (macrophages, stained brown) within the lamina propria were counted and graded on a scale from 1-3: Grade 1 (None/rare), Grade 2 (scattered superficial collections) and Grade 3 (strong, diffuse or band-like infiltrate in the superficial lamina propria) as shown above.

### Supplementary Figure 5: The Effect of Obesity on the Microbiota

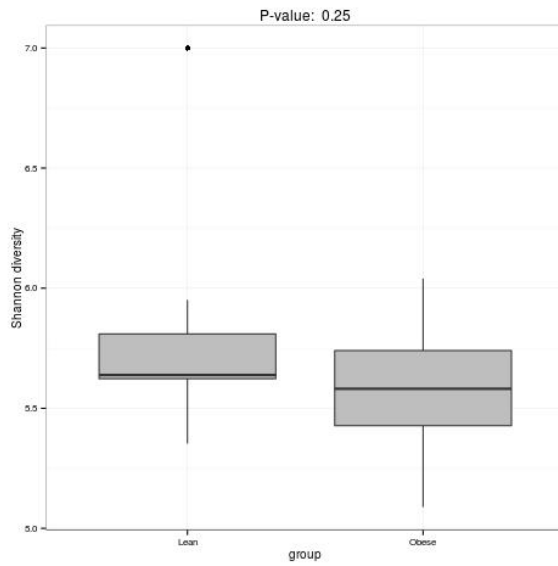

Nine African Americans and seven Africans were obese with BMI  $>30 \text{ kg/m}^2$  ( $p=\text{ns}$ , Chi-squared testing). There were no significant differences (Wilcoxon test) in microbiota diversity, shown by the Shannon diversity index, in our data between obese (BMI  $>30 \text{ kg/m}^2$ ) and lean individuals as illustrated.

## Supplementary Figure 6: Notable additional significant microbe changes during the study

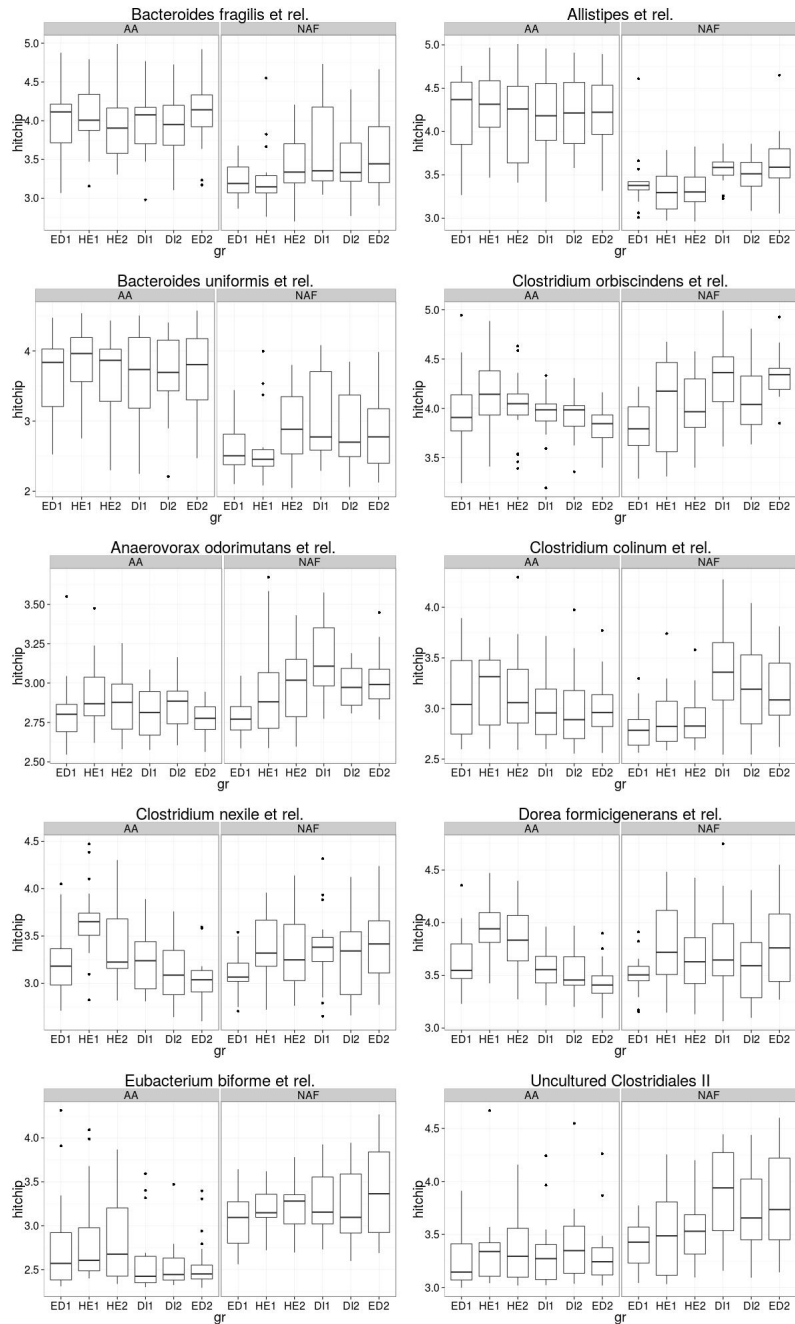

Supplemental Figure 6 illustrates the significant changes in specific bacteria during the time course of the study, as measured by global HITChip analysis, to complement those detected by targeted qPCR analysis shown in Figure 2.

## ***Supplementary Tables***

**Supplementary Table 1: Summary of Macronutrient and Fibre Compositions Before and After Diet Switch**

| Group            | Period       | Fat % | Carbohydrate % | Protein % | Fiber g/d |
|------------------|--------------|-------|----------------|-----------|-----------|
| African American | Usual        | 35    | 47             | 15        | 14        |
| Rural Africans   | Usual        | 16    | 72             | 11        | 66        |
| African American | Intervention | 16    | 70             | 14        | 55        |
| Rural Africans   | Intervention | 52    | 21             | 27        | 12        |

The macronutrient composition as % total energy for the usual and intervention diets in Africans and Americans before and after dietary change.

**Supplementary Table 2: Group mean values for the estimations of nutrient compositions of the Usual Diets in the African and American populations**

|                                | <b>Africans</b> | <b>African Americans</b> |
|--------------------------------|-----------------|--------------------------|
| Energy (Kcal)                  | 2353            | 2393                     |
| Total protein (g)              | 68.5            | 86                       |
| Plant protein (g)              | 46.2            | 26                       |
| Animal protein (g)             | 22.3            | 60                       |
| Total fat (g)                  | 42.4            | 96                       |
| Carbohydrate, avail. (g)       | 388.1           | 287                      |
| Total dietary fibre (g)        | 28*             | 14                       |
| Insoluble dietary fibre (g)    | 3.2             | 9                        |
| Soluble dietary fibre (g)      | 2.8*            | 6                        |
| Ca (mg)                        | 279             | 734                      |
| Fe (mg)                        | 10.7            | 15.5                     |
| Vitamin A (RE) (mcg)           | 966             | 4617                     |
| Total carotenoids (mcg)        | 5667            | 4617                     |
| B-Carotene (mcg)               | 5252            | 1948                     |
| A-Carotene (mcg)               | 788             | 411                      |
| Thiamin (mg)                   | 1.41            | 1.9                      |
| Riboflavin (mg)                | 0.69            | 2.2                      |
| Niacin (mg)                    | 12.9            | 27                       |
| Vitamin B6 (mg)                | 1.186           | 2                        |
| Folate (mcg)                   | 348             | 486                      |
| Vitamin B12 (mcg)              | 1.3             | 4.4                      |
| Pantothenate (mg)              | 4.45            | 5                        |
| Biotin (mcg)                   | 24.7            | 2                        |
| Vitamin C (mg)                 | 55              | 104                      |
| Vitamin D (mcg)                | 1.61            | 4.2                      |
| Vitamin E (mg)                 | 10.57           | 10.5                     |
| $\alpha$ -Tocopherol (mg)      | 4.62            | 9                        |
| Vitamin K (mcg)                | 276.42          | 177                      |
| Saturated fatty acids (FA) (g) | 8.75            | 33                       |
| Mono-unsaturated FA (g)        | 13.61           | 32                       |
| Polyunsaturated FA (g)         | 16.28           | 22                       |
| Cholesterol (mg)               | 82              | 323                      |
| Choline                        | 253             | 353                      |

\* Excludes resistant starch, estimated to contribute an additional 38g/d, making a total of 66g/d; see above discussion<sup>1</sup>.

Group mean values for dietary analysis based on 3 day recalls in the home environment on usual diets (data from 12 rural Africans and 11 African Americans)



### Supplemental Table 3: Intervention Diets

| <b>Intervention Diet Analysis</b> | <b>African Americans</b>     | <b>Africans</b> |
|-----------------------------------|------------------------------|-----------------|
| <b>Nutrients</b>                  |                              |                 |
| <b>Basic Components</b>           | Actual intakes<br>Daily mean |                 |
| Gram Weight (g)                   | 2292.7                       | 1550.4          |
| Calories (kcal)                   | 2205.8                       | 2526.2          |
| Calories from Fat (kcal)          | 368.4                        | 1299.8          |
| Calories from Sat Fat (kcal)      | 67.6                         | 502.8           |
| Protein (g)                       | 85.7                         | 170.2           |
| Carbohydrates (g)                 | 383.5                        | 128.1           |
| Dietary Fiber (g)                 | 44.0*                        | 9.0             |
| Soluble Fiber (g)                 | 3.6                          | 1.6             |
| Total Sugars (g)                  | 115.0                        | 31.7            |
| Monosaccharides (g)               | 28.0                         | 5.9             |
| Disaccharides (g)                 | 27.0                         | 12.1            |
| Other Carbs (g)                   | 94.6                         | 81.5            |
| Fat (g)                           | 41.5                         | 145.2           |
| Saturated Fat (g)                 | 7.5                          | 55.9            |
| Mono Fat (g)                      | 17.7                         | 53.0            |
| Poly Fat (g)                      | 6.9                          | 15.0            |
| Trans Fatty Acid (g)              | 0.6                          | 5.0             |
| Cholesterol (mg)                  | 273.7                        | 1108.6          |
| Water (g)                         | 1676.6                       | 1043.5          |
| Vitamin A - IU (IU)               | 13698.5                      | 25601.9         |
| Vitamin A - RAE (RAE)             | 817.3                        | 6816.6          |
| Carotenoid RE (RE)                | 1323.9                       | 301.3           |
| Retinol RE (RE)                   | 137.5                        | 6672.0          |
| Beta-Carotene (mcg)               | 5330.9                       | 1746.3          |
| Vitamin B1 (mg)                   | 1.8                          | 1.4             |
| Vitamin B2 (mg)                   | 1.4                          | 4.2             |
| Vitamin B3 (mg)                   | 16.0                         | 46.7            |
| Vitamin B3 - Niacin Equiv (mg)    | 26.7                         | 65.6            |
| Vitamin B6 (mg)                   | 1.6                          | 3.3             |
| Vitamin B12 (mcg)                 | 2.2                          | 61.7            |
| Biotin (mcg)                      | 18.9                         | 16.4            |
| Vitamin C (mg)                    | 118.4                        | 33.2            |
| Vitamin D - IU (IU)               | 108.3                        | 363.3           |
| Vitamin D - mcg (mcg)             | 2.7                          | 9.0             |

|                             |        |        |
|-----------------------------|--------|--------|
| Vitamin E - Alpha-Toco (mg) | 5.1    | 4.8    |
| Folate (mcg)                | 760.2  | 450.4  |
| Folate, DFE (mcg)           | 818.2  | 458.3  |
| Vitamin K (mcg)             | 282.1  | 102.0  |
| Pantothenic Acid (mg)       | 4.9    | 10.1   |
| Calcium (mg)                | 593.7  | 574.9  |
| Chromium (mcg)              | 2.5    | 5.7    |
| Copper (mg)                 | 1.6    | 10.4   |
| Fluoride (mg)               | 1.5    | 0.1    |
| Iodine (mcg)                | 88.6   | 56.2   |
| Iron (mg)                   | 15.8   | 22.4   |
| Magnesium (mg)              | 377.7  | 203.7  |
| Manganese (mg)              | 4.5    | 1.2    |
| Molybdenum (mcg)            | 59.1   | 24.2   |
| Phosphorus (mg)             | 943.0  | 1817.5 |
| Potassium (mg)              | 3857.5 | 2839.2 |
| Selenium (mcg)              | 87.1   | 164.4  |
| Sodium (mg)                 | 2423.3 | 3490.3 |
| Zinc (mg)                   | 7.7    | 29.8   |
| Omega 3 Fatty Acid (g)      | 0.8    | 1.1    |
| Omega 6 Fatty Acid (g)      | 4.1    | 6.5    |
| Alcohol (g)                 | 0.0    | 0.0    |
| Caffeine (mg)               | 352.5  | 86.1   |
| Choline (mg)                | 286.4  | 922.0  |

\* Excludes resistant starch as discussed above<sup>1</sup>

Group mean actual dietary intakes (SDs available) during dietary switch (food given minus food returned): The table shows the analysis of the major nutrient components given each day to the 2 groups during the 14 day dietary switch, highlighting the low animal protein and fat, and high carbohydrate and fibre content of the African American intervention, and the high animal protein and fat, low fibre content of the African intervention. Note that the actual fibre intake in the African American intervention diet was higher as the content of resistant starch was not added (estimated to be an additional 9 g/day<sup>1</sup>, making an average total of 53g/d).

**Supplementary Table 4: Intervention Menu Examples**

**a) High Fat, Low Fibre Intervention Diet for Africans**

|       | <b>Breakfast</b>               | <b>Lunch</b>                 | <b>Dinner</b>                            |
|-------|--------------------------------|------------------------------|------------------------------------------|
| Day 1 | Beef Sausage Links<br>Pancakes | Hamburger<br>French Fries    | Meatloaf<br>Rice                         |
| Day 2 | Beef Kielbasa<br>Grits         | Meatballs<br>Spaghetti       | Salisbury Steak<br>Noodles               |
| Day 3 | Breakfast Steak<br>Hash Browns | Chili w Meat<br>Rice         | Roast Beef<br>Mashed Potatoes &<br>Gravy |
| Day 4 | Corned Beef Hash<br>Potatoes   | Beef Hotdog<br>Baked Beans   | T-Bone Steak<br>Macaroni & Cheese        |
| Day 5 | Beef Bacon<br>Rice Krispies    | Beef Stew<br>Potatoes        | Fried Liver & Onions<br>Rice             |
| Day 6 | Beef Sausage Patty<br>Biscuits | Stuffed Bell Peppers<br>Rice | Beef BBQ Ribs<br>Steak Fries             |

**b). High Fibre, Low Fat Diet for African Americans**

|       | <b>Breakfast</b>                   | <b>Lunch</b>                       | <b>Dinner</b>                              |
|-------|------------------------------------|------------------------------------|--------------------------------------------|
| Day 1 | Hi-Maize<br>Corn Fritters          | Hi-Maize Corn Dogs<br>w Veggie Dog | Okra/Tomatoes/Hi-Maize Meal                |
|       | Salmon Croquettes<br>w Hi-Maize RS | Homemade<br>Tater Tots             | Hi-Maize RS Corn Muffins<br>Black-eye Peas |
|       | Spinach/Red Pepper<br>& Onions     | Mango slices                       | Pineapple<br>Black Tea                     |

|       |                                                                                            |                                                                                                                |                                                                              |
|-------|--------------------------------------------------------------------------------------------|----------------------------------------------------------------------------------------------------------------|------------------------------------------------------------------------------|
| Day 2 | Buttermilk Corn Biscuits<br>Banana<br>Hi-Maize RS Cheese Grits<br>Scrambled Egg Substitute | Catfish Nuggets<br>breaded with<br>Hi-Maize RS<br>Hi-Maize<br>Hushpuppies<br>Kale Salad<br>w Hi-Maize Croutons | Lentils<br>Rice<br>Hi-Maize Cornbread<br>African Potato Salad<br>Guava Juice |
| Day 3 | ProNutro Cereal                                                                            | Navy bean soup                                                                                                 | Fish Taco (Tilapia)                                                          |

**c). Detailed Example of Day 1 High Fibre, Low Fat Menu for the Dietary Intervention in African Americans, based on 2000kcal/day**

|                    |                                                                                                                                                                                  | Weigh and record edible portion for items with 'X' | Weigh and record leftover portion |
|--------------------|----------------------------------------------------------------------------------------------------------------------------------------------------------------------------------|----------------------------------------------------|-----------------------------------|
| <b>Breakfast</b>   |                                                                                                                                                                                  |                                                    |                                   |
| 50 g (raw weight)  | South African Maize Meal                                                                                                                                                         | X                                                  |                                   |
| 50 g               | Buttermilk, 1% fat (bring 250 g water to a boil, slowly add South African maize meal while constantly stirring to prevent lumps. Add buttermilk and cook on low heat for 1 hour) |                                                    |                                   |
| 1 large            | Large egg (fried in sunflower oil with salt and pepper)                                                                                                                          |                                                    |                                   |
| 1 slice            | Schwebel's Enriched White Bread                                                                                                                                                  |                                                    |                                   |
| 10 g raw           | Tomato slice (fry in oil with egg, place on top)                                                                                                                                 |                                                    |                                   |
| 300 ml             | Coffee                                                                                                                                                                           |                                                    |                                   |
| 8 g                | Half and Half                                                                                                                                                                    |                                                    |                                   |
| 4 g                | Sugar (for coffee)                                                                                                                                                               |                                                    |                                   |
| 4 g                | Sugar (for phutu)                                                                                                                                                                |                                                    |                                   |
| 1 medium           | Banana (remove peel and weigh and record weight)                                                                                                                                 | X                                                  |                                   |
| <b>Mid-morning</b> |                                                                                                                                                                                  |                                                    |                                   |
| 300 ml             | Coffee                                                                                                                                                                           |                                                    |                                   |
| 8 g                | Half and Half                                                                                                                                                                    |                                                    |                                   |
| 4 g                | Sugar                                                                                                                                                                            |                                                    |                                   |
| <b>Lunch</b>       |                                                                                                                                                                                  |                                                    |                                   |
| 100 g cooked       | Cooked potatoes, peeled, diced                                                                                                                                                   |                                                    |                                   |
| 100 g cooked       | Swiss chard                                                                                                                                                                      |                                                    |                                   |
| 10 g cooked        | Onions (sautee in sunflower oil)                                                                                                                                                 |                                                    |                                   |
| 5 g                | Sunflower oil (for sauteeing onions)                                                                                                                                             |                                                    |                                   |
| 0.5 g              | Salt (for potatoes, swiss chard & onion mixture)                                                                                                                                 |                                                    |                                   |
| 100 g cooked       | White rice                                                                                                                                                                       |                                                    |                                   |
| 0.5 g              | Rice spice seasoning                                                                                                                                                             |                                                    |                                   |
| 70 g cooked        | Chicken breast, boneless, skinless                                                                                                                                               |                                                    |                                   |
| 5 g raw            | Chopped onion (put on chicken before baking)                                                                                                                                     |                                                    |                                   |
| 0.2 g              | black pepper                                                                                                                                                                     |                                                    |                                   |
| 0.5 g              | salt (brush chicken with sunflower oil & bake in oven)                                                                                                                           |                                                    |                                   |
| 150 g              | Pineapple juice                                                                                                                                                                  |                                                    |                                   |

|                   |                                                                                                                                                               |   |
|-------------------|---------------------------------------------------------------------------------------------------------------------------------------------------------------|---|
| Mid-<br>Afternoon |                                                                                                                                                               |   |
| 100 g raw         | Samp (raw Samp soaked for 6 hours)                                                                                                                            | X |
| 100 g raw         | Sugar Beans / Cranberry Beans (raw beans soaked for 6 hours)                                                                                                  | X |
| 7 g               | Sunflower oil                                                                                                                                                 |   |
| 10 g raw          | Onions                                                                                                                                                        |   |
| 0.5 g             | Curry Powder                                                                                                                                                  |   |
| 0.5 g             | Salt                                                                                                                                                          |   |
| 0.2 g             | Black Pepper                                                                                                                                                  |   |
|                   | (Boil beans for 1 hour. Add samp, cook another hour. Add onions, oil, spices, then cook 1 hour more. Record weight when all items cooked and mixed together). | X |
|                   | Weight of Mid Afternoon Samp and Beans                                                                                                                        | X |
| Dinner            |                                                                                                                                                               |   |
|                   | Samp & Beans                                                                                                                                                  | X |
| 300 ml            | Roobios Tea                                                                                                                                                   |   |
| 4 g               | Sugar                                                                                                                                                         |   |
| 4 g               | Lemon juice (for tea)                                                                                                                                         |   |
| Evening           |                                                                                                                                                               |   |
| 1 medium          | Orange (remove peel and weigh)                                                                                                                                | X |
| 1 slice           | Schwebel's White Bread (toasted)                                                                                                                              |   |
| 7 g               | Apricot Jam                                                                                                                                                   |   |

**Supplementary Table 5: Histological staining of colonic biopsies**

**a) Scoring criteria for the histological assessment of mucosal biopsies**

| Key | Scoring criteria | Lamina Propria Chronic Inflammation                                                              | Intra-epithelial lymphocytes |
|-----|------------------|--------------------------------------------------------------------------------------------------|------------------------------|
| 0   | Normal           | Normal density and distribution                                                                  | <5 /100                      |
| 1   | mild             | Scattered foci of deep chronic inflammation                                                      | 5-10/100                     |
| 2   | moderate         | Diffuse superficial and deep chronic inflammation without expansion of the lamina propria        | 11-20/100                    |
| 3   | marked           | Diffuse superficial and deep with expansion of the lamina propria with basal lymphoplasmacytosis | >20/100                      |

**b) Illustration of the higher densities of inflammatory cells within the lamina propria in Africans at baseline**

| Baseline Differences             |          | African Americans |        | Africans |        | p-value |
|----------------------------------|----------|-------------------|--------|----------|--------|---------|
|                                  |          | N                 | %      | N        | %      |         |
| Lamina Propria (LP) inflammation | Normal   | 21                | 36.8%  | 0        | 0.0%   | 0.0001  |
|                                  | Mild     | 33                | 57.9%  | 18       | 50.0%  |         |
|                                  | Moderate | 3                 | 5.3%   | 18       | 50.0%  |         |
| Total                            |          | 57                | 100.0% | 36       | 100.0% |         |

**c) Illustration of the higher densities of intraepithelial lymphocytes in Africans at baseline**

|                              |             | African Americans |        | Africans |        | P-value |
|------------------------------|-------------|-------------------|--------|----------|--------|---------|
|                              |             | N                 | %      | N        | %      |         |
| Intraepithelial Inflammation | Normal/Mild | 51                | 89.5%  | 2        | 5.6%   | 0.0001  |
|                              | Moderate    | 6                 | 10.5%  | 5        | 13.9%  |         |
|                              | Marked      | 0                 | 0.0%   | 29       | 80.6%  |         |
| Total                        |             | 57                | 100.0% | 36       | 100.0% |         |

**d) Eosinophil counts from biopsies taken from the sigmoid colon were non-significantly higher in Africans at baseline**

| Location: Sigmoid colon     |     |                   |        |          |        |       |
|-----------------------------|-----|-------------------|--------|----------|--------|-------|
|                             |     | African Americans |        | Africans |        |       |
|                             |     | N                 | %      | N        | %      |       |
| Increased eosinophils in LP | No  | 5                 | 27.8%  | 2        | 16.7%  | P=0.7 |
|                             | Yes | 13                | 72.2%  | 10       | 83.3%  |       |
| Total                       |     | 19                | 100.0% | 12       | 100.0% |       |

**Supplementary Table 5** summarizes the H&E histological staining light microscopy results from the biopsies taken from the sigmoid, transverse, and ascending colon, which show significantly higher grades of inflammation in the lamina propria, and intraepithelial lymphocyte counts in Africans, which persisted following dietary switch. The scoring system used is shown on the first table. Note that 3 sets of biopsies were taken from each subject, hence the maximum number of measurements were 20x3 for lamina propria and intraepithelial assessments. Unfortunately some samples were lost during transport, preparation or staining. Of note, the formalin preserved samples for the first 8 African participants were lost in transportation from the rural areas. Findings from the different regions of the colon showed the same pattern of differences. Left sided eosinophilic infiltration (measured only in the sigmoid colon as changes in the other regions of the colon are considered less clinically significant) was noted in 83% of Africans and 72% of African Americans. In addition to schistosoma, intestinal spirochaetosis was also identified in the biopsies of three African subjects.



### Supplementary Table 6: Targeted Faecal Short Chain Fatty Acid and Bile Acid Analysis

|                  | African Americans |      |         | Rural Africans |      |         |
|------------------|-------------------|------|---------|----------------|------|---------|
|                  | ED1               | ED2  | p value | ED1            | ED2  | p value |
| Acetate          | 17.2              | 29.9 | 0.01    | 73.2           | 41.4 | 0.02    |
| Propionate       | 5.3               | 9.2  | 0.001   | 20.1           | 10.6 | 0.003   |
| Butyrate         | 4.2               | 7.3  | 0.01    | 13.4           | 6.6  | 0.01    |
| Total bile acids | 64.4              | 40.7 | 0.009   | 5.5            | 9.5  | 0.0001  |

Group median values for the major faecal short chain fatty acids and total bile acids (all in  $\mu\text{mol/g}$  faeces) for 20 Africans and 20 Americans before (period ED 1, Table 1) and after dietary switch (period ED 2), statistical evaluation across the time points by Kruskal Wallis test. See **Figure 2** for box plots.

### Supplementary Table 7: Colonic Evacuate Analysis

| mmoles                  | African American (AA) |                  |         | African (A)      |                  |         | p Value   |
|-------------------------|-----------------------|------------------|---------|------------------|------------------|---------|-----------|
|                         | Before                | After            | p Value | Before           | After            | p Value | Baselines |
| <b>Acetate</b>          | 14.51 $\pm$ 3.29      | 32.97 $\pm$ 8.07 | 0.040   | 49.76 $\pm$ 9.41 | 25.48 $\pm$ 3.71 | 0.039   | 0.0002    |
| <b>Propionate</b>       | 3.97 $\pm$ 0.83       | 8.53 $\pm$ 2.08  | 0.048   | 12.58 $\pm$ 1.93 | 8.20 $\pm$ 0.82  | 0.068   | 0.0000    |
| <b>Butyrate</b>         | 3.56 $\pm$ 0.96       | 8.61 $\pm$ 2.10  | 0.034   | 12.30 $\pm$ 2.42 | 6.66 $\pm$ 0.97  | 0.038   | 0.0005    |
| <b>Lithocholic acid</b> | 0.08 $\pm$ 0.01       | 0.03 $\pm$ 0.01  | 0.019   | 0.01 $\pm$ 0.002 | 0.06 $\pm$ 0.02  | 0.033   | 0.0001    |
| <b>Cholic acid</b>      | 0.46 $\pm$ 0.13       | 0.17 $\pm$ 0.06  | 0.073   | 0.04 $\pm$ 0.01  | 0.18 $\pm$ 0.06  | 0.036   | 0.0030    |
| <b>Deoxycholic acid</b> | 0.52 $\pm$ 0.12       | 0.16 $\pm$ 0.05  | 0.020   | 0.04 $\pm$ 0.01  | 0.14 $\pm$ 0.04  | 0.038   | 0.0004    |

Measurements of short chain fatty acid and bile acid contents in colonic evacuates (mmoles/total evacuate) showing significant population differences at baseline (Mann-Whitney), followed by significant (Wilcoxon signed rank test) reciprocal changes in African Americans and rural Africans following diet switch. Total evacuate quantities were 1.50 $\pm$ 0.13 litres in 20 African Americans and 1.63 $\pm$ 0.10 litres in 20 Africans (p=0.17). Using these figures plus measurements of SCFA and BA concentrations in the evacuates to calculate total colonic quantities showed that, in general, faecal concentrations reflected the same changes as colonic contents.

**Supplementary Table 8: Baseline Differences in Faecal Microbial Genera**

| Phylum/Class                    | Genus-like group                          | FDR   | African Americans (%) | Africans (%) |
|---------------------------------|-------------------------------------------|-------|-----------------------|--------------|
| Actinobacteria                  | <i>Collinsella</i>                        | <0.01 | 0.0                   | 0.1          |
| Bacilli                         | <i>Enterococcus</i>                       | 0.02  | 0.0                   | 0.1          |
| Bacteroidetes                   | <i>Bacteroides uniformis</i> et rel.      | <0.01 | 1.4                   | 0.1          |
| Bacteroidetes                   | <i>Allistipes</i> et rel.                 | <0.01 | 3.9                   | 0.7          |
| Bacteroidetes                   | <i>Bacteroides fragilis</i> et rel.       | <0.01 | 2.0                   | 0.3          |
| Bacteroidetes                   | <i>Bacteroides ovatus</i> et rel.         | <0.01 | 1.1                   | 0.3          |
| Bacteroidetes                   | <i>Bacteroides vulgatus</i> et rel.       | <0.01 | 15.1                  | 1.8          |
| Bacteroidetes                   | <i>Parabacteroides distasonis</i> et rel. | <0.01 | 1.1                   | 0.4          |
| Bacteroidetes                   | <i>Bacteroides stercoris</i> et rel.      | <0.01 | 0.5                   | 0.1          |
| Bacteroidetes                   | <i>Bacteroides intestinalis</i> et rel.   | <0.01 | 0.2                   | 0.0          |
| Bacteroidetes                   | <i>Bacteroides plebeius</i> et rel.       | <0.01 | 0.6                   | 0.3          |
| Bacteroidetes                   | <i>Prevotella melaninogenica</i> et rel.  | <0.01 | 11.7                  | 48.5         |
| Bacteroidetes                   | <i>Prevotella oralis</i> et rel.          | <0.01 | 2.0                   | 7.3          |
| Bacteroidetes                   | <i>Bacteroides splachnicus</i> et rel.    | <0.01 | 0.9                   | 0.4          |
| Bacteroidetes                   | <i>Prevotella ruminicola</i> et rel.      | <0.01 | 0.0                   | 0.1          |
| Bacteroidetes                   | <i>Tannerella</i> et rel.                 | <0.01 | 0.4                   | 0.2          |
| <i>Clostridium</i> cluster I    | <i>Clostridia</i>                         | <0.01 | 0.2                   | 0.4          |
| <i>Clostridium</i> cluster III  | <i>Clostridium stercorarium</i> et rel.   | 0.02  | 0.1                   | 0.2          |
| <i>Clostridium</i> cluster IV   | <i>Subdoligranulum variable</i> et rel.   | 0.01  | 2.5                   | 1.0          |
| <i>Clostridium</i> cluster IX   | <i>Mitsuokella multiacida</i> et rel.     | <0.01 | 0.1                   | 0.4          |
| <i>Clostridium</i> cluster IX   | <i>Megasphaera elsdenii</i> et rel.       | 0.02  | 0.1                   | 0.4          |
| <i>Clostridium</i> cluster IX   | Uncultured Selenomonadaceae               | 0.03  | 0.1                   | 0.0          |
| <i>Clostridium</i> cluster IX   | <i>Dialister</i>                          | 0.047 | 4.6                   | 0.1          |
| <i>Clostridium</i> cluster XI   | <i>Clostridium difficile</i> et rel.      | <0.01 | 0.1                   | 0.4          |
| <i>Clostridium</i> cluster XIVa | <i>Clostridium symbiosum</i> et rel.      | <0.01 | 2.6                   | 1.0          |
| <i>Clostridium</i> cluster XIVa | <i>Anaerostipes caccae</i> et rel.        | <0.01 | 0.7                   | 0.2          |
| <i>Clostridium</i> cluster XIVa | <i>Eubacterium ventriosum</i> et rel.     | <0.01 | 0.2                   | 0.1          |
| <i>Clostridium</i> cluster XIVa | <i>Bryantella formatexigens</i> et rel.   | <0.01 | 1.5                   | 0.4          |
| <i>Clostridium</i> cluster XIVa | <i>Ruminococcus obeum</i> et rel.         | 0.02  | 1.8                   | 1.3          |
| Uncultured Clostridiales        | Uncultured Clostridiales II               | 0.03  | 0.3                   | 0.7          |
| Verrucomicrobia                 | <i>Akkermansia</i>                        | 0.02  | 1.4                   | 0.2          |

The genus-like groups that differed between Africans and African Americans at baseline. The most significantly different taxa between 20 Africans and 20 African Americans are shown (False Discovery Rate FDR<5%). The fraction of total HITChip signal is used as a proxy for relative abundance, and the average over the samples is provided for each comparison. In line with our previous observations<sup>2</sup> (same populations, different individuals), of the Bacteroidetes phylum, *Bacteroides* is the dominant genus in African Americans, while Africans are dominated by the genus *Prevotella*.

**Supplementary Table 9: Plasma Amino Acids in Africans and African Americans Before and After Dietary Change**

|         | African Americans |            |         | Rural Africans |            |         |
|---------|-------------------|------------|---------|----------------|------------|---------|
|         | Pre: ED 1         | Post: ED 2 | p value | Pre: ED 1      | Post: ED 2 | p value |
| Total   | 1358±98           | 1355±40    | Ns      | 1209±34        | 1393±87    | ns      |
| Alanine | 325±23            | 320±21     | Ns      | 237±20         | 347±30     | 0.01    |

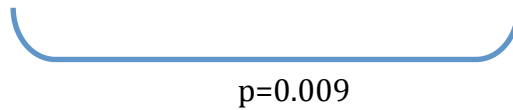
  
 p=0.009

Group mean ± SE values for plasma amino acid concentrations (µmol/l) showing significantly lower values of the most abundant amino acid, alanine, in 20 rural Africans compared to 20 African Americans at baseline (ED 1, Table 1) (Mann-Whitney). The group mean differences in the other amino acids were not significant. Following diet switch (ED 2), alanine significantly increased in rural Africans (Wilcoxon signed rank test).

**Supplementary Table 10: Demographics of Participants**

|                   | Age (yr) | Weight (kg) | Height (cm) | Body mass index (kg/m <sup>2</sup> ) |
|-------------------|----------|-------------|-------------|--------------------------------------|
| African Americans | 55.6±0.8 | 87.1±4.0    | 172.5±2.4   | 29.4±0.8                             |
| Rural Africans    | 54.8±1.0 | 73.1±3.3*   | 163.5±2.2** | 27.7±1.5                             |

Summary of the demographic features of the 2 groups. Age and body mass index were similar for the two groups, but Africans were significantly shorter (p=0.009, Mann-Whitney) and lighter (p=0.01). Nine African Americans and seven Africans were obese with BMI >30 kg/m<sup>2</sup> (p=ns, Chi-squared testing).

**Supplementary Table 11: List of abbreviations and full names for metabolites in the networks shown in Figure 5.**

| Abbreviated name                     | Full Name                                             |
|--------------------------------------|-------------------------------------------------------|
| (3S)-Cit-CoA                         | (3S)-Citryl-CoA                                       |
| 1,2-Propanediol                      | 1,2-Propanediol                                       |
| 1DeO-D-xylulose 5P                   | 1-Deoxy-D-xylulose 5-phosphate                        |
| 2(OH-Et)-2-oxobutanoate              | 2-Aceto-2-hydroxybutanoate                            |
| 2(OH-Et)TPP                          | 2-Hydroxyethyl-TPP                                    |
| 2,3,4,5-TetraH-dipicolinate          | 2,3,4,5-Tetrahydrodipicolinate                        |
| 2,3DiOH-3Me-valerate                 | 2,3-DiOH-3Me-valerate                                 |
| 2,3DiOH-isovalerate                  | 2,3-Dihydroxyisovalerate                              |
| 2,4DiOH-hept-2-enedioate             | 2,4-Dihydroxyhept-2-enedioate                         |
| 2,5DiOH-pyridine                     | 2,5-Dihydroxypyridine                                 |
| 2,5-Dioxopentanoate                  | 2,5-Dioxopentanoate                                   |
| 2,6-DiAm-pimelate                    | 2,6-Diaminopimelate                                   |
| 2-[2Cx-4Methiazol-5(2H)-ylidene]Et P | 2-[2-Carboxy-4Methiazol-5(2H)-ylidene]ethyl phosphate |
| 2-Acetolactate                       | 2-Acetolactate                                        |
| 2Am-3Cx-muconate semiAl              | 2-Amino-3-carboxymuconate semialdehyde                |
| 2Am-6-oxopimelate                    | 2-Amino-6-oxopimelate                                 |
| 2DeH-3deO-6P-D-galactonate           | 2-Dehydro-3-deoxy-6-phospho-D-galactonate             |
| 2DeH-pantoate                        | 2-Dehydropantoate                                     |
| 2DeO-D-ribose 5P                     | 2-Deoxy-D-ribose 5-phosphate                          |
| 2Me-1(OH-Bu)TPP                      | 2-Methyl-1-hydroxybutyl-TPP                           |
| 2Me-1(OH-Pr)TPP                      | 2-Methyl-1-hydroxypropyl-TPP                          |
| 2Me-butanoyl-CoA                     | 2-Methyl-butanoyl-CoA                                 |
| 2Me-citrate                          | 2-Methylcitrate                                       |
| 2OH-glutarate                        | 2-Hydroxyglutarate                                    |
| 2-Oxo-3deO-6P-gluconate              | 2-Keto-3-deoxy-6-phosphogluconate                     |
| 2-Oxobutyrate                        | 2-Oxobutyrate                                         |
| 2-Oxoglutarate                       | 2-Oxoglutarate                                        |
| 2-Oxoisocaproate                     | 2-Oxoisocaproate                                      |
| 2-Oxoisovalerate                     | 2-Ketovaline                                          |
| 2Ph-acetamide                        | 2-Phenylacetamide                                     |
| 3,4DiOH-mandelaldehyde               | 3,4-Dihydroxymandelaldehyde                           |
| 3,4DiOH-mandelate                    | 3,4-Dihydroxymandelate                                |
| 3Cx-1(OH-Pr)TPP                      | 3-Carboxy-1-hydroxypropyl-TPP                         |
| 3DeH-sphinganine                     | 3-Dehydrosphinganine                                  |
| 3Fum-pyruvate                        | 3-Fumarylpyruvate                                     |
| 3HIV                                 | 3-Hydroxyisovalerate                                  |
| 3HIV-CoA                             | 3-Hydroxyisovaleryl-CoA                               |
| 3IsoPr-malate                        | 3-Isopropylmalate                                     |

| <b>Abbreviated name</b>  | <b>Full Name</b>                          |
|--------------------------|-------------------------------------------|
| 3Me-1(OH-Bu)TPP          | 3-Methyl-1-hydroxybutyl-TPP               |
| 3Me-2-oxopentanoate      | 3-Methyl-2-oxopentanoate                  |
| 3Me-crotonyl-CoA         | 3-Methyl-crotonyl-CoA                     |
| 3Me-TLA SO               | 3-Methylthiolactic acid sulfoxide         |
| 3Me-TPA SO               | 3-Methylthiopyruvic acid sulfoxide        |
| 3OH-3Me-2-oxopentanoate  | 3-Hydroxy-3-Methyl-2-oxopentanoate        |
| 3OH-anthranilate         | 3-Hydroxyanthranilate                     |
| 3OH-mandelate            | 3-Hydroxymandelate                        |
| 3OH-Tyr                  | 3-Hydroxy-tyrosine                        |
| 3-Oxopropanoate          | 3-Oxopropanoate                           |
| 3-Ureidopropionate       | 3-Ureidopropionate                        |
| 4-Cresol                 | 4-Cresol                                  |
| 4CS                      | 4-Cresyl sulfate                          |
| 4-Guanidinobutanoate     | 4-Guanidinobutanoate                      |
| 4HPA-CoA                 | 4-Hydroxyphenylacetyl-CoA                 |
| 4HPA-Glu                 | 4-Hydroxyphenylacetylglutamate            |
| 4OH-2-oxoglutarate       | 4-Hydroxy-2-oxoglutarate                  |
| 4OH-2-oxohexanoate       | 4-Hydroxy-2-oxohexanoate                  |
| 4OH-2-oxopimelate        | 4-Hydroxy-2-ketopimelate                  |
| 4OH-2-oxovalerate        | 4-Hydroxy-2-oxovalerate                   |
| 4OH-benzaldehyde         | 4-Hydroxybenzaldehyde                     |
| 4OH-benzoate             | 4-Hydroxybenzoate                         |
| 4OH-benzoyl-CoA          | 4-Hydroxybenzoyl-CoA                      |
| 4OH-hippurate            | 4-Hydroxyhippurate                        |
| 4OH-phenacyl alcohol     | 4-Hydroxyphenacyl alcohol                 |
| 4-Oxobutanoate           | 4-Oxobutanoate                            |
| 5,10My-THF               | 5,10Methylene-THF                         |
| 5DeH-4deO-D-glucarate    | 5-Dehydro-4-deoxy-D-glucarate             |
| 5Me-3-oxo-4-hexenoyl-CoA | 5-Methyl-3-oxo-4-hexenoyl-CoA             |
| 5Me-THF                  | 5-Methyltetrahydrofolate                  |
| 5OH-isourate             | 5-Hydroxyisourate                         |
| 5P-ribosylamine          | 5-Phosphoribosylamine                     |
| 6ASA                     | 6-Aminosalicylic acid                     |
| 6OH-3-succinoylpyridine  | 6-Hydroxy-3-succinoylpyridine             |
| 6OH-nicotinate           | 6-Hydroxynicotinate                       |
| Ac-adenylate             | Acetyl adenylate                          |
| Ac-choline               | Acetylcholine                             |
| Ac-CoA                   | Acetyl-CoA                                |
| Acetate                  | Acetate                                   |
| Adenine                  | Adenine                                   |
| Adenylosuccinate         | Adenylosuccinate                          |
| ADMA                     | N $\omega$ ,N $\omega$ -Dimethyl-arginine |

| <b>Abbreviated name</b>  | <b>Full Name</b>                   |
|--------------------------|------------------------------------|
| ADP-ribose               | ADP-ribose                         |
| Adrenaline               | Adrenaline                         |
| Ala                      | Alanine                            |
| Allantoate               | Allantoate                         |
| Allantoin                | Allantoin                          |
| AMP                      | Adenosine 5-monophosphate          |
| Anthranilate             | 2-Aminobenzoate                    |
| Anthraniloyl-CoA         | Anthraniloyl-CoA                   |
| Arachidonate             | Arachidonate                       |
| Arachidonyl-CoA          | Arachidonyl-CoA                    |
| Arg                      | Arginine                           |
| Argininosuccinate        | Argininosuccinate                  |
| Arterenol                | Arterenol                          |
| Asp                      | Aspartate                          |
| Betaine                  | Betaine                            |
| Betaine aldehyde         | Betaine aldehyde                   |
| Biocytin                 | Biocytin                           |
| Biotin                   | Biotin                             |
| Biotinyl-5AMP            | Biotinyl-5-adenosine monophosphate |
| Butyrate                 | Butyrate                           |
| Butyryl-CoA              | Butyryl-CoA                        |
| Carbamate                | Carbamate                          |
| Carbamoyl P              | Carbamoyl phosphate                |
| Carnitine                | Carnitine                          |
| Catechol                 | Catechol                           |
| Choline                  | Choline                            |
| Choline P                | Phosphocholine                     |
| Choloyl-CoA              | Choloyl-CoA                        |
| Chorismate               | Chorismate                         |
| Citicoline               | Citicoline                         |
| Citrate                  | Citrate                            |
| Citrulline               | Citrulline                         |
| CMP                      | Cytidine-5-monophosphate           |
| CoA                      | Coenzyme A                         |
| Creatine                 | Creatine                           |
| Creatinine               | Creatinine                         |
| Cys                      | Cysteine                           |
| CysGly                   | Cysteinylglycine                   |
| Cystathionine            | Cystathionine                      |
| Cytidine                 | Cytidine                           |
| Cytosine                 | Cytosine                           |
| D-arabino-6P-hex-3-ulose | D-arabino-6-Phospho-hex-3-ulose    |

| <b>Abbreviated name</b> | <b>Full Name</b>           |
|-------------------------|----------------------------|
| D-Arabinose             | D-Arabinose                |
| Deamido-NAD             | Deamido-NAD                |
| DeP-CoA                 | Dephospho-CoA              |
| D-Fructose 6P           | D-Fructose 6-phosphate     |
| D-Glucosamine P         | D-Glucosamine phosphate    |
| DHF                     | Dihydrofolate              |
| DiH-LipE                | Dihydrolipoamide-E         |
| DMA                     | Dimethylamine              |
| DMF                     | N,N-Dimethylmethanamide    |
| DMG                     | Dimethylglycine            |
| Dopamine                | Dopamine                   |
| D-Ribose                | D-Ribose                   |
| D-Ribulose              | D-Ribulose                 |
| D-Ribulose 5P           | D-Ribulose 5-phosphate     |
| D-Xylose                | D-Xylose                   |
| D-Xylulose              | D-Xylulose                 |
| D-Xylulose 5P           | D-Xylulose 5-phosphate     |
| Ethanal                 | Ethanal                    |
| FA                      | Fatty acid                 |
| For-kynurenine          | Formylkynurenine           |
| Formate                 | Formate                    |
| Formylanthranilate      | Formylanthranilate         |
| Fumarate                | Fumarate                   |
| GABA                    | gamma-Aminobutyric acid    |
| GAR                     | Glycinamide ribonucleotide |
| Gln                     | Glutamine                  |
| Glu                     | Glutamate                  |
| Glu 5-semiAl            | Glutamate 5-semialdehyde   |
| Gly                     | Glycine                    |
| Glyceraldehyde 3P       | Glyceraldehyde 3-phosphate |
| Glycerone P             | Glycerone phosphate        |
| Glycerophosphoric acid  | Glycerophosphoric acid     |
| Glycocholate            | Glycocholate               |
| Glycolaldehyde          | Glycolaldehyde             |
| Glycolate               | Glycolate                  |
| Glyoxylate              | Glyoxylate                 |
| GMP                     | Guanosine 5-monophosphate  |
| GPC                     | Glycerophosphocholine      |
| GSH                     | Glutathione                |
| GTP                     | Guanosine 5-triphosphate   |
| Guanidinoacetate        | Glycocyamine               |
| hCys                    | Homocysteine               |

| <b>Abbreviated name</b> | <b>Full Name</b>                         |
|-------------------------|------------------------------------------|
| Homocitrate             | Homocitrate                              |
| HTPA                    | 4-Hydroxy-2,3,4,5-tetrahydrodipicolinate |
| Hydrouracil             | Hydrouracil                              |
| Hypoxanthine            | Hypoxanthine                             |
| IAA                     | Indole-3-acetic acid                     |
| Ile                     | Isoleucine                               |
| IminoAsp                | Iminoaspartate                           |
| IminoGly                | Iminoglycine                             |
| IMP                     | Inosine 5-monophosphate                  |
| Indole-3-acetamide      | Indole-3-acetamide                       |
| Indoleglycerol P        | Indoleglycerol phosphate                 |
| Inosine                 | Inosine                                  |
| Isobutyryl-CoA          | Isobutyryl-CoA                           |
| Isocitrate              | Isocitrate                               |
| Isovaleryl-CoA          | Isovaleryl-CoA                           |
| KDO                     | 2-Dehydro-3-deoxy-D-octonate             |
| Kynurenine              | L-Kynurenine                             |
| Lactaldehyde            | Lactaldehyde                             |
| Lactate                 | Lactate                                  |
| Lecithin                | Lecithin                                 |
| Leu                     | Leucine                                  |
| Linoleate               | Linoleate                                |
| Linolenate              | Linolenate                               |
| Linoleoyl-CoA           | Linoleoyl-CoA                            |
| LipE                    | Lipoamide-E                              |
| LTA4                    | Leukotriene A4                           |
| LTC4                    | Leukotriene C4                           |
| L-Xylulose              | L-Xylulose                               |
| Lys                     | Lysine                                   |
| Malate                  | Malate                                   |
| Mal-CoA                 | Malyl-CoA                                |
| Me-corrinoid            | Methylcorrinoid                          |
| MeOH                    | Methanol                                 |
| meso-2,6-DiAm-pimelate  | meso-2,6-Diaminopimelate                 |
| Methanal                | Methanal                                 |
| Methyl-CoM              | Methylcoenzyme M                         |
| MMA                     | Methylamine                              |
| N2Cit-N6Ac-N6OH-Lys     | N2-Cityl-N6-Acetyl-N6-hydroxylysine      |
| N6Ac-2,6-diAm-pimelate  | N6-Acetyl-2,6-diaminopimelate            |
| N6Ac-Lys                | N6-Acetyl-lysine                         |
| N6Ac-N6-Indol-3-yl-Lys  | N6-[(Indol-3-yl)acetyl]-lysine           |
| N6Ac-N6OH-Lys           | N6-Acetyl-N6-hydroxylysine               |



| <b>Abbreviated name</b>        | <b>Full Name</b>                       |
|--------------------------------|----------------------------------------|
| N6OH-Lys                       | N6-hydroxylysine                       |
| NA                             | Nicotinamide                           |
| NAc-Asp                        | N-Acetylaspartate                      |
| NAc-citrulline                 | N-Acetylcitrulline                     |
| NAc-D-glucosamine 6P           | N-Acetyl-D-glucosamine 6-phosphate     |
| NAc-D-mannosamine              | N-Acetyl-D-mannosamine                 |
| NAc-Orn                        | N-Acetyl-ornithine                     |
| NAc-SMCSO                      | N-Acetyl-S-Methyl-L-cysteine sulfoxide |
| NAD                            | Nicotinamide adenine dinucleotide      |
| NANA                           | N-Acetyl neuraminic acid               |
| N-Car-Asp                      | N-Carbamoyl-aspartate                  |
| N-For-Asp                      | N-Formylaspartate                      |
| N-For-Glu                      | N-Formylglutamate                      |
| N-For-maleamic acid            | N-Formylmaleamic acid                  |
| Nicotinate                     | Nicotinate                             |
| Nicotinate ribonucleotide      | Nicotinate ribonucleotide              |
| NMN                            | Nicotinamide mononucleotide            |
| NMNA                           | Trigonelline                           |
| N-Ribosyl NA                   | N-Ribosylnicotinamide                  |
| N-Suc-Glu                      | N-Succinylglutamate                    |
| N $\omega$ -(ADP-D-ribosyl)Arg | Nomega-(ADP-D-ribosyl)-arginine        |
| OAc-carnitine                  | O-Acetylcarnitine                      |
| OAc-Ser                        | O-Acetylserine                         |
| Orn                            | Ornithine                              |
| O-Suc-hSer                     | O-Succinylhomoserine                   |
| Oxaloacetate                   | Oxaloacetate                           |
| PAG                            | Phenylacetylglutamine                  |
| Palmitoylcarnitine             | Palmitoylcarnitine                     |
| Palmitoyl-CoA                  | Palmitoyl-CoA                          |
| Pantoate                       | Pantoate                               |
| Pantothenate                   | Pantothenate                           |
| PAP                            | Phosphoadenosine phosphate             |
| PhAc                           | Phenylacetate                          |
| PhAc-CoA                       | Phenylacetyl-CoA                       |
| Phe                            | Phenylalanine                          |
| Phenol                         | Phenol                                 |
| Propanal                       | Propanal                               |
| Propionate                     | Propionate                             |
| Propionyladenylate             | Propionyladenylate                     |
| Propionyl-CoA                  | Propanoyl-CoA                          |
| PRPP                           | PRPP                                   |
| Psi 5P                         | Pseudouridine 5-phosphate              |

| <b>Abbreviated name</b>                 | <b>Full Name</b>                                     |
|-----------------------------------------|------------------------------------------------------|
| PtdSer                                  | Phosphatidylserine                                   |
| Pyruvate                                | Pyruvate                                             |
| Quinolate                               | Quinolate                                            |
| Ribose 5P                               | Ribose 5-phosphate                                   |
| S-(2Me-Bt)diH-LipE                      | S-(2-Methyl-butanoyl)-DiH-LipE                       |
| S-(2Me-Pp)diH-LipE                      | S-(2-Methyl-propanoyl)-DiH-LipE                      |
| S-(3Me-Bt)diH-LipE                      | S-(3-Methyl-butanoyl)-DiH-LipE                       |
| S-(MeOH)GSH                             | S-(Hydroxymethyl)glutathione                         |
| Saccharopine                            | Saccharopine                                         |
| S-Adenosyl-hCys                         | S-Adenosylhomocysteine                               |
| Sarcosine                               | Sarcosine                                            |
| SelenoCys                               | Selenocysteine                                       |
| Selenocystathionine                     | Selenocystathionine                                  |
| Ser                                     | Serine                                               |
| S-For-GSH                               | S-Formylglutathione                                  |
| SMCSO                                   | S-Methyl-L-cysteine sulfoxide                        |
| S-Suc-diH-LipE                          | S-SuccinylDiH-LipE                                   |
| Succinate                               | Succinate                                            |
| Suc-CoA                                 | Succinyl-CoA                                         |
| tBA                                     | tert-Butanol                                         |
| TCE                                     | Trichloroethylene                                    |
| Thr                                     | Threonine                                            |
| TMA                                     | Trimethylamine                                       |
| TMAO                                    | Trimethylamine N-oxide                               |
| TPP                                     | Thiamin pyrophosphate                                |
| Trp                                     | Tryptophan                                           |
| Tyr                                     | Tyrosine                                             |
| Tyramine                                | Tyramine                                             |
| UDP-3-O-(βOH-myristoyl)-NAc-glucosamine | UDP-3-O-(beta-hydroxymyristoyl)-N-Acetyl-glucosamine |
| UDP-NAc-glucosamine                     | UDP-N-Acetyl-glucosamine                             |
| UMP                                     | UMP                                                  |
| Uracil                                  | Uracil                                               |
| Urate                                   | Urate                                                |
| Urea                                    | Urea                                                 |
| Ureidoperacrylic acid                   | Ureidoperacrylic acid                                |
| Uridine                                 | Uridine                                              |
| Val                                     | Valine                                               |
| Valerate                                | Valerate                                             |
| Valeryl-CoA                             | Pentanoyl-CoA                                        |
| Xanthine                                | Xanthine                                             |
| Xylitol                                 | Xylitol                                              |
| Xylulose 1P                             | Xylulose 1-phosphate                                 |

| Abbreviated name | Full Name              |
|------------------|------------------------|
| αIsoPr-malate    | alpha-Isopropylmalate  |
| α-Linolenoyl-CoA | alpha-Linolenoyl-CoA   |
| βAla             | beta-Alanine           |
| βAlaArg          | beta-Alanyl-arginine   |
| βAlaLys          | beta-Alanyl-lysine     |
| βMe-Mal-CoA      | beta-Methyl-malyl-CoA  |
| γGluCys          | gamma-Glutamylcysteine |

Explanation for the abbreviations used for metabolites measured by <sup>1</sup>H-NMR and shown in the networks in Figure 5.

## Supplementary Notes

### Supplementary Note 1: Additional Study Details

**Study Design:** Subjects were not housed and fed their usual diets for the home environment study as validation studies had been previously conducted in both communities to verify that the diets, microbiome, metabolome and mucosal biomarkers of cancer risk, i.e. epithelial proliferation measured by Ki67staining were distinct, particularly with regard to the dietary macronutrient composition, rates of colonic saccharolytic fermentation, bile acid deconjugation and mucosal proliferation<sup>2,3</sup>. Recruitment would have been problematic for a 4-week in-house study, because in rural Africa, healthy middle-aged members of the population conventionally look after grandchildren while their parents work, and in America it would be difficult for employed African Americans to take 4 weeks off, thus biasing selection.

**Recruitment:** Overall, the study was well accepted by both communities and recruitment followed the estimated timelines. Only 6 African Americans who satisfied the inclusion and exclusion criteria decided not to join the study. Recruitment was easier in rural Africa, as more potential candidates were unemployed, and only one interviewed potential candidate decided not to join the study.

#### Inclusion criteria

1. Informed consent
2. Ages 50-65 years, inclusive
3. BMI between 20-35 Kg/m<sup>2</sup>: In our last study, average BMI was in the overweight-moderately obese category for both groups, i.e. 30.5(3.0) Kg/m<sup>2</sup> in AAs and 28.0(1.2) in Africans. To maintain representation of the sample to the general population we will limit our inclusion criteria to the weight range of the previous study, i.e. BMI 20-35, avoid severe (Class II) and very severe obesity (Class III), and balance the 2 groups.

**Exclusion criteria**

1. Previous GI surgery resulting disturbed gut function due to in loss of bowel or altered anatomy
2. Any form of chronic GI disease resulting in disturbed gut function, diarrhea, and malabsorption
3. Any form of acute GI disease disturbing GI function and needing current medication, e.g. gastroenteritis, peptic ulcer disease
4. Abnormal blood tests: CBC, ESR, urea and electrolytes, LFTs
5. The detection of previously unrecognized ulceration (with depth and >0.5cm), stricture, severe inflammation, and polyps >1cm diameter during screening endoscopy
6. History of any GI malignancy
7. Present GI malignancy, previously known or detected at screening endoscopy
8. Presence of any other form of cancer or malignancy
9. Oral or IV antibiotic therapy within the last 6 weeks
10. Unable or unwilling to modify dietary intake
11. Insulin or steroid therapy that may result in altered gut function or immunity
12. Chronic non-steroidal anti-inflammatory medication, or use of short-term NSAIDS within 4 weeks of study.
13. Known HIV disease
14. Severe obesity with BMI>35kg/m<sup>2</sup>

**Supplementary Note 2: African Living Conditions “HOME ENVIRONMENT”**

The environment and living conditions of the African and African American populations are quite different. The rural South Africans live in small family communities of several traditional ‘pole and dagga’ (wooden poles plastered with clay) thatched circular huts (‘rondavels’), now being gradually replaced with more robust brick and tin roof structures. Each community has about 5 acres of land, leased from the local chief, which supports small seasonal (during the ‘rainy season’ November to March) vegetable gardens that grow limited supplies of corn, pumpkins, watermelons, spinach and papayas, and a variety of animals, chickens, goats, and maybe a few cattle. Cattle are considered a sign of wealth and are used for milk and only slaughtered on ceremonial occasions. Consequently, milk products are consumed, but rarely fresh: it is left outside the huts to ferment, and then consumed with relish as ‘maas’. Eggs are also eaten when available, but meat in any form is scarce and generally added as flavouring rather than forming the signature component. Foods are generally boiled, not fried, and cooked in cast iron pots on open wood fires in a separate hut. Electricity is becoming more available, but is still very rudimentary and unreliable. The diet consists chiefly of ‘putu’, a stiff porridge made from refined commercial corn flour called ‘mielie meal’, with salt and vegetables added for flavouring. It is eaten communally, and forms the bulk of the 2-3 meals consumed each day. Water is usually obtained from community wells, but also from the rivers. Roads consist of rough tracks through the bush and most people have to walk between settlements and to the closest main road to catch public transport (private minicab taxis) to the towns.

Thus, there are many environmental differences that could explain the differences in disease patterns. In this study, we focus on the differences in dietary intakes, as epidemiological surveys have concluded that they most influence colon cancer risk, and they are most modifiable.

**Supplementary Note 3: Colonoscopy findings:** Colonoscopy was considered normal in four Americans and ten Africans. Adenomatous polyps were found and removed in nine Americans and no Africans. Hyperplastic polyps were confirmed by biopsy in eight Americans and in two Africans: four Americans had both adenomatous and hyperplastic polyps. Diverticula were seen in 14 Americans and no Africans. On the other hand, endoscopic evidence of mucosal inflammation was only seen in Africans: visual evidence of mild-moderate asymptomatic patchy colitis was seen and confirmed by histology in seven Africans. In five it involved the proctosigmoid region, in one the left colon and in one other, the whole colon. In the latter two subjects, the histology revealed dense lymphocytic infiltration associated with schistosoma. In one patient with macroscopically normal appearing mucosa, a 6 cm segment of a tapeworm was seen in the transverse colon.

## ***Supplementary Discussion***

### **Potential Confounders**

**Effect of Obesity:** Subgroup analysis did not show any distinct differences between the moderately obese and non-obese, but our study was not powered to answer this question, and the subgroup numbers are too few to closely examine the effect of obesity. It is important to note that we used each subject as his/her own control and have reported only those bacterial groups that change systematically and significantly following the dietary intervention, detected with paired statistical testing to control host factors, such as BMI and antibiotic exposure > 6 weeks prior to study, that remain approximately constant within each individual during the study period. However, we confirmed that there were no significant differences ( $p=0.25$ ; Wilcoxon test) in microbiota diversity in our data between obese and lean individuals (Supplementary Figure 5).

**Antibiotic Exposure:** From the published evidence, 6 weeks antibiotic-free was a reasonable cut-off to use, as although short-term use of antibiotics may have some long-term influence on microbiota composition, its functional significance is doubtful. The topic has been recently reviewed by Keeney et al.<sup>4</sup> with some studies showing complete recovery within 4 weeks and

others long term losses of specific OTUs. The functional consequence of these losses was not detected, as there were no clinical manifestations, which is not surprising given the large overlap in metabolic activity between genetically distinct microbes. Again, we need to stress that the use of each subject as his/her own control should prevent this and other factors, such as the use of antibiotics in childhood, from being a significant confounder in the interpretation of our results, namely that increasing fibre increases saccharolytic fermentation and butyrogenesis whereas increasing fat increases secondary bile acid production by the microbiota. One might also argue that taking antibiotics is part of the way of life in westernized society, and this might be one of the reasons why westernized diseases, including colon cancer, are so much more common. Finally, it should be noted that the paper by Relman's group concluded that inter-individual variation was the major source of variability between samples<sup>5</sup> again emphasizing the importance of using each subject as his own control.

### **Microbial and Metabolite Stability after Colonoscopy**

Although we have generally presented the results of our analyses at two points during the study, namely prior to the first colonoscopy ('home environment' sample whilst subjects consumed their usual food, and prior to the last colonoscopy after two weeks of diet exchange, we analyzed fecal samples at 6 different time points in order to discriminate diet effect from temporal variation and the potential disturbance due to bowel washout and colonoscopy:

1. Whilst on their usual diet prior to the initial colonoscopy (ED1)
2. 1 week after the first colonoscopy (HE1)
3. 2 weeks after the first colonoscopy (HE2)
4. 1 week after the diet intervention (DI1)
5. 2 weeks after the diet intervention (DI2)
6. Prior to the final colonoscopy (ED2).

Part of the reason why we took multiple samples was because of theoretical concerns we had that colonoscopy and bowel preparation might affect the microbiota (as suggested by Gorkiewicz et al<sup>6</sup> and Harrell et al<sup>7</sup> but refuted by O'Brien et al<sup>8</sup>) and their metabolism. Examination of the results of our targeted qPCR measurements of microbes (functional genes) of interest and metabolites (short chain fatty acids and bile acids) shown on Figure 2, and global HITChip phylogenetic analyses shown on Figure 3 and Supplementary Figure 6, indicate that there were no significant differences between time points 1 and 3, whilst there were between 1 and 6. Evaluation across the repeat measures by Kruskal Wallis test indicated that dietary exchange had the predominant effect.

## **Supplementary Methods**

**Home Environment Dietary Analysis:** Estimated usual average daily dietary intakes for the African Americans were based on 3-day recalls and computerized analysis. With rural Africans, visits were made to the participants' homes in addition to dietary recalls and computerized analysis. Dietary analysis was conducted by the collection of individual data by 3-day recall method by a trained local dietician and interpreter and compositional analysis with the aid of locally produced computer software. The Nutrition Data System for Research Software, developed by the Nutrition Coordinating Center, University of Minnesota, Minneapolis, MN (database version 4.02–30, released July 1998), was used for the analysis of the African American diets. For African subjects, data collection was similar and analysis was performed using MRC FoodFinder, computerized software containing analysis of local South African foods<sup>9</sup>. It should be noted that the analysis shown on Supplementary Table 3 does not include resistant starch, which we would estimate as contributing a further 38 g of soluble fibre from our previous measurements of carbohydrate malabsorption of 10% in rural Africans<sup>10</sup>. The figure might have been higher as Ahmed and Segal<sup>1</sup> calculated that approximately 18% of maize meal converts to resistant starch after traditional African food preparation and cooking. The analyses on Supplementary Table 3 must be considered best estimates as recalls were only completed in the last 11/20 African Americans and 12/20 rural Africans, and considerable variation was reported in the 3-day recalls, necessitating exclusion of recalls <1000 kcal/d as all subjects were healthy and active, and were subsequently shown to need >2000 kcal to maintain their body weights when in the exchange study. The same pattern of dietary differences are seen when all recalls are used, but it seems more correct to exclude readings of <1000 kcal/d and put more weight on the other 2 readings. Dietary recall is known to underestimate actual intakes and is notoriously imprecise. Perhaps of more importance were the calculated differences in macronutrient distribution shown on **Table 1**, which are less dependent on the accuracy of dietary recall.

**Dietary Interventions:** The dietary intervention for African Americans at the University of Pittsburgh's Clinical and Translational Research Center included a rotating three-day menu cycle for 14 days (Supplementary Table 4). The composition of the intervention diet for African Americans was similar to that of traditional Africans, namely high complex carbohydrate, low meat and fat. The diet for each subject was calculated based on the following: 30-35 kcal/kg IBW, 14% protein, 16% fat, 70% carbohydrate, 55 g dietary fiber.

Traditional African foods provided on the menus included Phutu and Samp & Beans. Phutu, a porridge made from Hi-Maize corn meal, is high in resistant starch. Samp is dried corn kernels and the beans used were sugar beans. The Phutu was provided every other day and the Samp & Beans were provided daily. In the Phutu recipe, all subjects received the same amount of Hi-Maize meal (50 g raw weight). In addition, all subjects received the same amount of Samp & Beans daily (100 g raw weight of both Samp and beans). The amounts of the other foods served varied depending on the subjects' calorie needs. The vegetables provided included sweet and white potatoes, cabbage, and Swiss chard. Fruits included mango, banana, pineapple, orange, apple juice and apricot mango nectar. Small portions of protein foods were provided which included eggs, peanut butter, chicken thigh, chicken breast and tilapia. Small amounts of fats

were used in cooking which included sunflower oil and tub margarine. Other carbohydrate sources included whole wheat bread, white bread and white rice. Other foods such as apricot jam, sugar, half and half were calculated into the menus to achieve calorie needs.

Cooking methods were similar to traditional African preparation. Phutu was cooked by adding it slowly to boiling water stirring constantly to prevent lumps. Buttermilk was also added to the recipe. The Phutu continued to simmer in a pot on low heat for one hour. The Samp & Beans were soaked overnight in water. First the beans were boiled for an hour in water and then the Samp was added. The Samp & Beans cooked for another hour before adding other ingredients (onion, tomato, curry, salt, pepper). Once all the ingredients were added, the Samp & Beans cooked on low heat in a covered pot for an additional four hours. The chicken and fish were baked in the oven. Eggs were either hard cooked or fried in a small amount of sunflower oil. The cabbage was sautéed in oil with onions and spices. The Swiss chard was cooked with beet stems. Other foods like potatoes and rice were boiled. Subjects were encouraged to consume all foods however foods that were not consumed were weighed back and documented. Copies of the menus with the total amounts of foods served and returned were given to the study dietitian for analysis. Overall, subjects consumed the majority of foods provided.

Weights were obtained on admission and daily thereafter. If the subject had a weight loss of 2 kg the calorie level of the menus was adjusted. Most subjects were able to maintain their weight within 2 kg throughout the study. However, for those few subjects who did have weight loss of 2 kg, extra calories were provided by additional juice or fruit to bring them back to within 2kg of baseline.

At screening potential subjects were asked about their food preferences and dislikes. Particularly in regards to those foods on the intervention diet menus. When possible, potential subjects were given a sample of Samp & Beans to try at screening. Once admitted to the study and the menus were in progress if subjects had palatability concerns attempts were made to improve the acceptance of the foods. For instance additional spices could be added (garlic powder, extra salt and pepper, extra curry powder, hot sauce, etc.) adding Splenda to the Phutu resulted in better consumption for those subjects who found it difficult to eat.

On occasion, some subjects would make special requests regarding meal timing, additional foods and/or beverages. The dietary staff would address these requests with the study nutritional specialist, Dr. Ruder, and every attempt was made to accommodate the subjects' request while keeping within the study protocol.

The procedure followed in the dietary interventions in Africa was similar, with the overall dietary composition consisting of 52% fat, 21% carbohydrate, 27% protein and 12g fiber per day. Foods were purchased from the supermarket in Empangeni, the closest large town, and either used immediately for the cooked meals, or frozen. All components were common to what is available in the USA and what are usually used in westernized cooking (Supplementary Table 4).



## Supplementary References

1. Ahmed R, Segal I, Hassan H. Fermentation of dietary starch in humans. *Am J Gastroenterol*. Apr 2000;95(4):1017-1020.
2. Ou J, Carbonero F, Zoetendal EG, et al. Diet, microbiota, and microbial metabolites in colon cancer risk in rural Africans and African Americans. *Am J Clin Nutr*. Jul 2013;98(1):111-120.
3. O'Keefe SDC, D Mahmoud, N, Sepulveda AR, and Manafe M. Why Do African Americans Get More Colon Cancer than Native Africans? *J. Nutr*. January 1, 2007 2007;137(1):175S-182.
4. Keeney KM, Yurist-Doutsch S, Arrieta MC, Finlay BB. Effect of Antibiotics on Human Microbiota and Subsequent Disease. *Annual review of microbiology*. Jun 2 2014.
5. Dethlefsen L, Relman DA. Incomplete recovery and individualized responses of the human distal gut microbiota to repeated antibiotic perturbation. *Proc Natl Acad Sci U S A*. Mar 15 2011;108 Suppl 1:4554-4561.
6. Gorkiewicz G, Thallinger GG, Trajanoski S, et al. Alterations in the colonic microbiota in response to osmotic diarrhea. *PLoS One*. 2013;8(2):e55817.
7. Harrell L, Wang Y, Antonopoulos D, et al. Standard colonic lavage alters the natural state of mucosal-associated microbiota in the human colon. *PLoS One*. 2012;7(2):e32545.
8. O'Brien CL, Allison GE, Grimpen F, Pavli P. Impact of colonoscopy bowel preparation on intestinal microbiota. *PLoS One*. 2013;8(5):e62815.
9. MRC food composition tables. 3rd ed. Parow, S Africa: SA Medical Research Council; . 1991.
10. O'Keefe SJ, Kidd M, Espitalier-Noel G, Owira P. Rarity of colon cancer in Africans is associated with low animal product consumption, not fiber. *Am J Gastroenterol*. May 1999;94(5):1373-1380.
